# Supplementary material for: Pentafluorophenyl Platinum(II) Complexes of PTA and Its N-Allyl and N-Benzyl Derivatives: Synthesis, Characterization and Biological Activity
Source: PubMed Central journal article supplement (PMC6926962; doi:10.3390/ma12233907), 2019-11-26
Supplement: materials-12-03907-s001.pdf [file materials-12-03907-s001.pdf]

## Electronic Supplementary Information (ESI)

# Pentafluorophenyl Platinum(II) Complexes of PTA and its N-Allyl and N-Benzyl Derivatives: Synthesis, Characterization and Biological Activity

Paolo Sgarbossa <sup>1,\*</sup>, Urszula Śliwińska-Hill <sup>2</sup>, M. Fátima C. Guedes da Silva <sup>3</sup>, Barbara Bażanów <sup>4</sup>, Aleksandra Pawlak <sup>5</sup>, Natalia Jackulak <sup>4</sup>, Dominik Poradowski <sup>6</sup>, Armando J. L. Pombeiro <sup>3</sup> and Piotr Smoleński <sup>7,\*</sup>

<sup>1</sup> Dipartimento di Ingegneria Industriale and CIRCC, Consorzio Interuniversitario per le Reattività Chimiche e la Catalisi, Università di Padova, via Marzolo 9, 35131 Padova, Italy; paolo.sgarbossa@unipd.it

<sup>2</sup> Department of Analytical Chemistry, Faculty of Pharmacy, Wrocław Medical University, Borowska 211 A, 50-566 Wrocław, Poland; urszula.sliwinska-hill@umed.wroc.pl

<sup>3</sup> Centro de Química Estrutural, Instituto Superior Técnico, Universidade de Lisboa, Av. Rovisco Pais, 1049-001 Lisboa, Portugal; fatima.guedes@tecnico.ulisboa.pt (M.F.C.G.d.S.); pombeiro@tecnico.ulisboa.pt (A.J.L.P.)

<sup>4</sup> Department of Veterinary Microbiology, Wrocław University of Environmental and Life Sciences, Norwida 31, 50-375 Wrocław, Poland; barbara.bazanow@upwr.edu.pl (B.B.); natalia.jackulak@upwr.edu.pl (N.J.)

<sup>5</sup> Department of Biochemistry, Pharmacology and Toxicology, Wrocław University of Environmental and Life Sciences, Norwida 31, 50-375 Wrocław, Poland; aleksandra.pawlak@upwr.edu.pl

<sup>6</sup> Department of Biostructure and Animal Physiology, Wrocław University of Environmental and Life Sciences, Kozuchowska 1/3, 51-631 Wrocław, Poland; dominik.poradowski@upwr.edu.pl

<sup>7</sup> Faculty of Chemistry, University of Wrocław, F. Joliot-Curie 14, 50-383 Wrocław, Poland; piotr.smolenski@chem.uni.wroc.pl

\* Correspondence: paolo.sgarbossa@unipd.it (P. Sgarbossa); piotr.smolenski@chem.uni.wroc.pl (P. Smoleński)

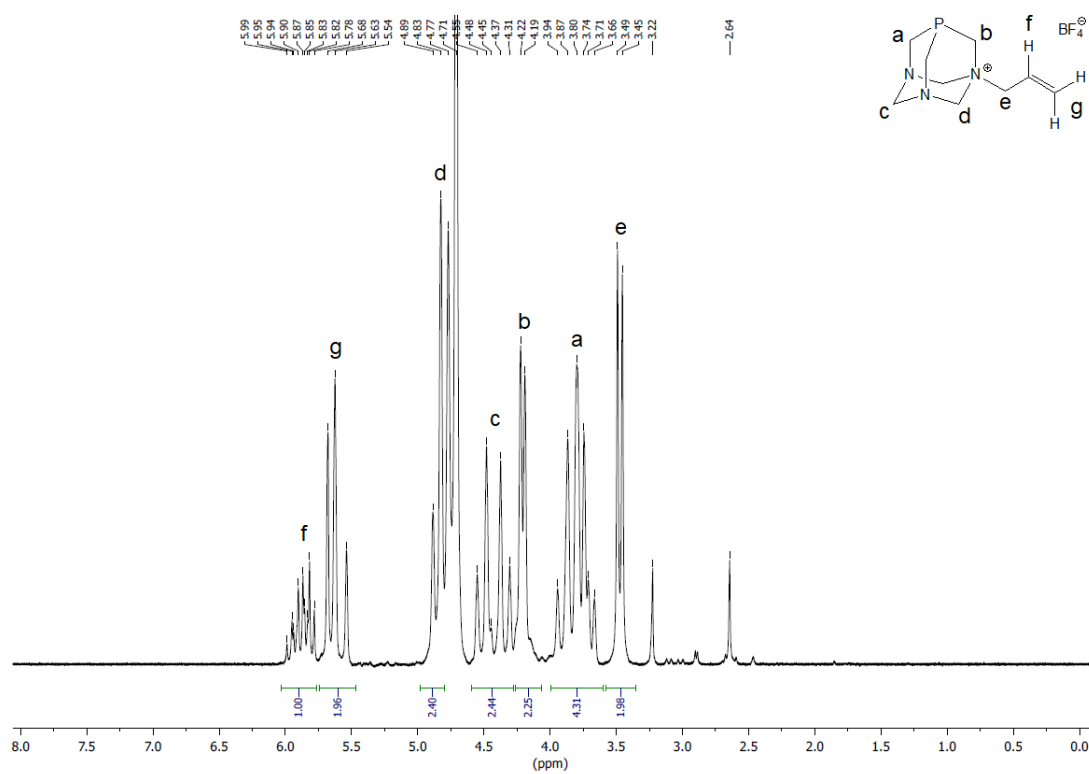Figure S1.  $^1\text{H}$  NMR spectrum of ligand **1b**.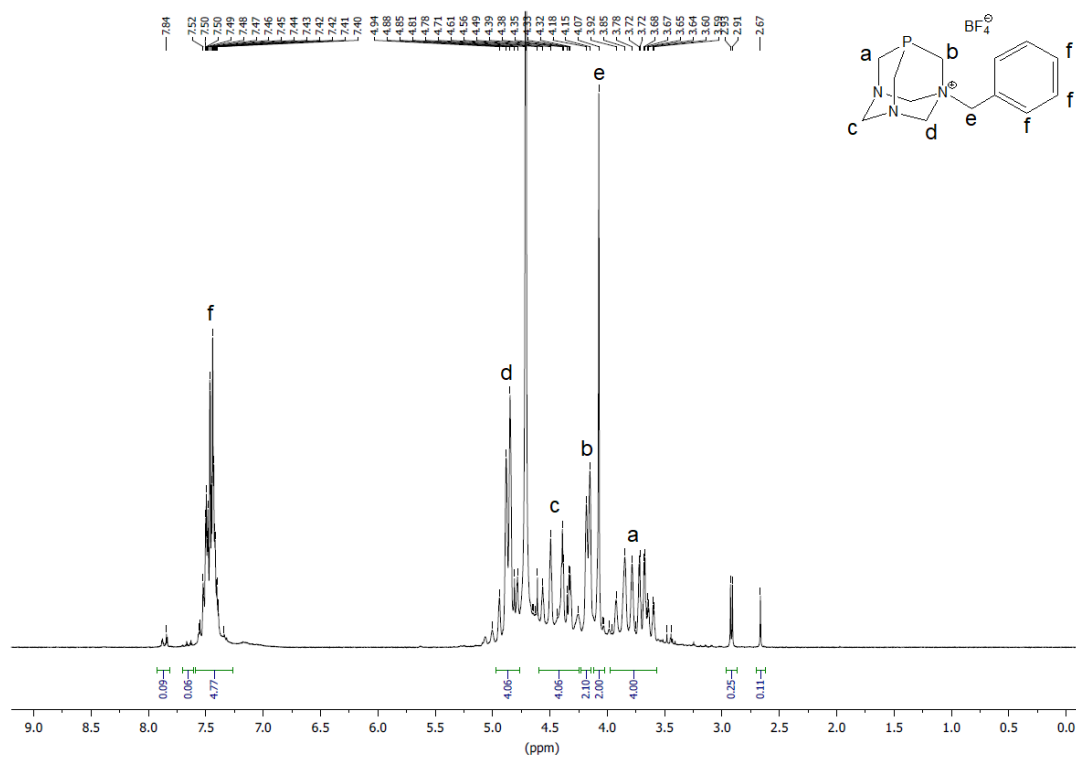Figure S2.  $^1\text{H}$  NMR spectrum of ligand **1c**.

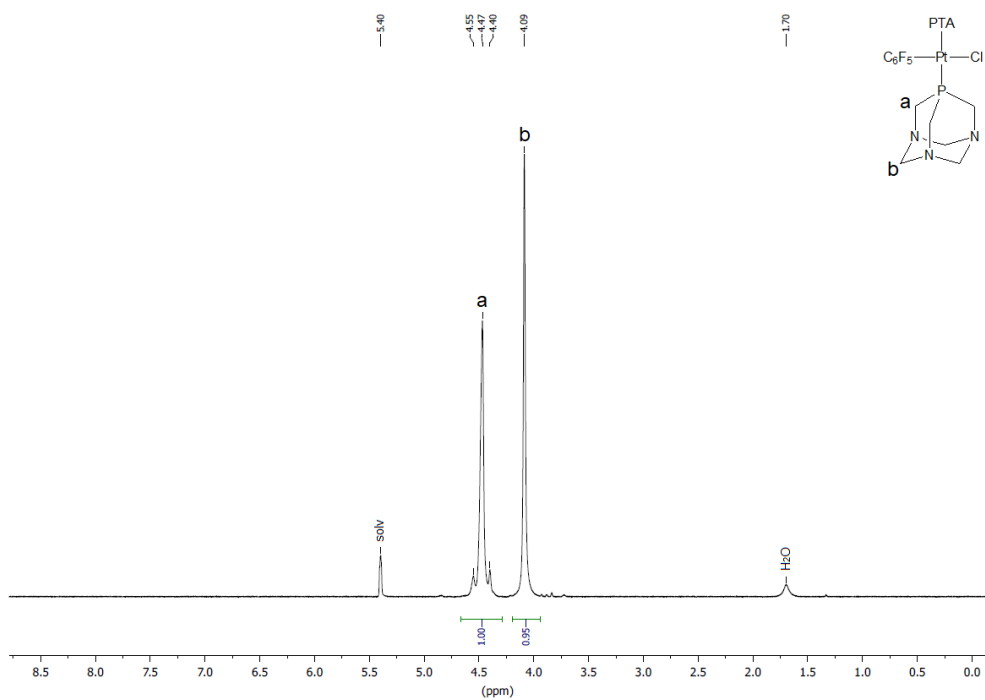Figure S3.  $^1\text{H}$  NMR spectrum of complex 2a.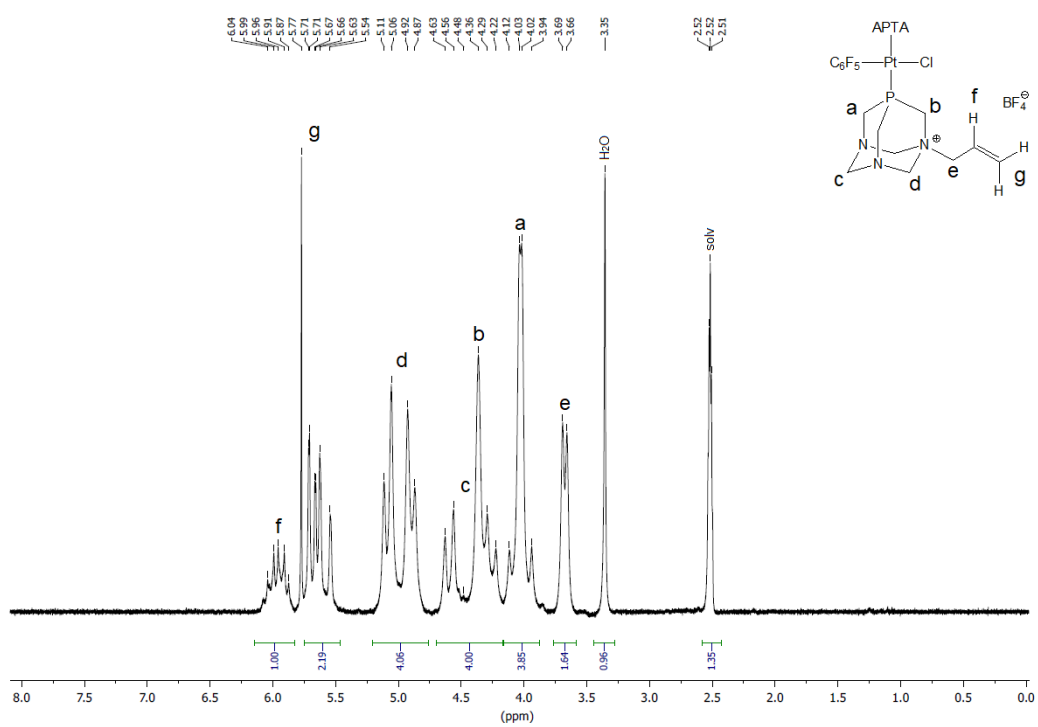Figure S4.  $^1\text{H}$  NMR spectrum of complex 2b.

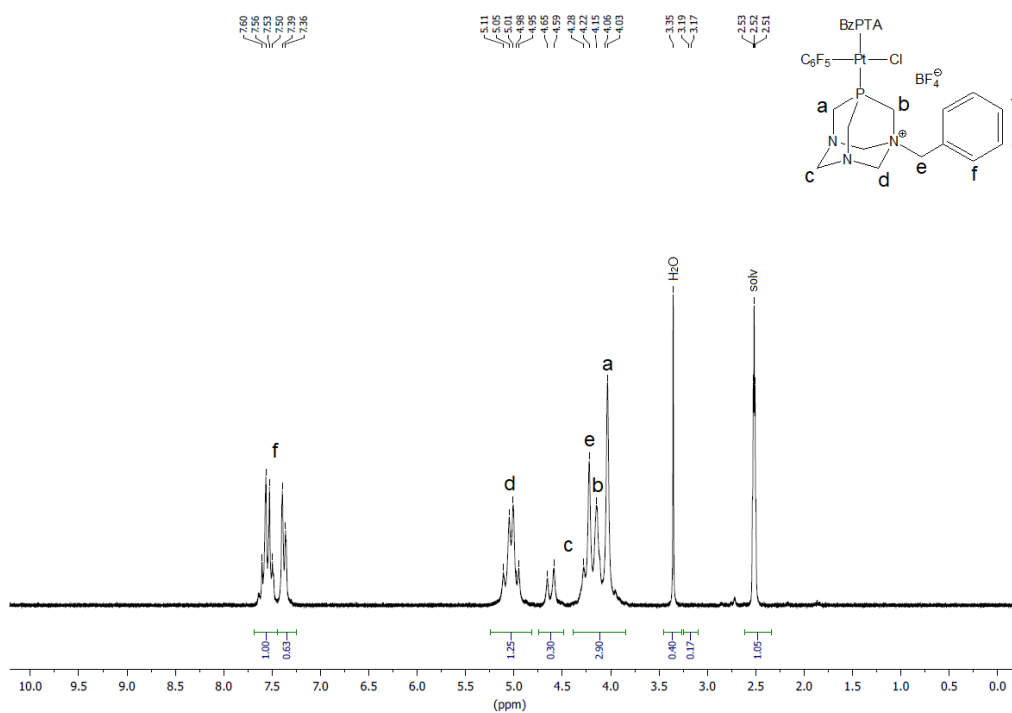

Figure S5.  $^1\text{H}$  NMR spectrum of complex **2c**.

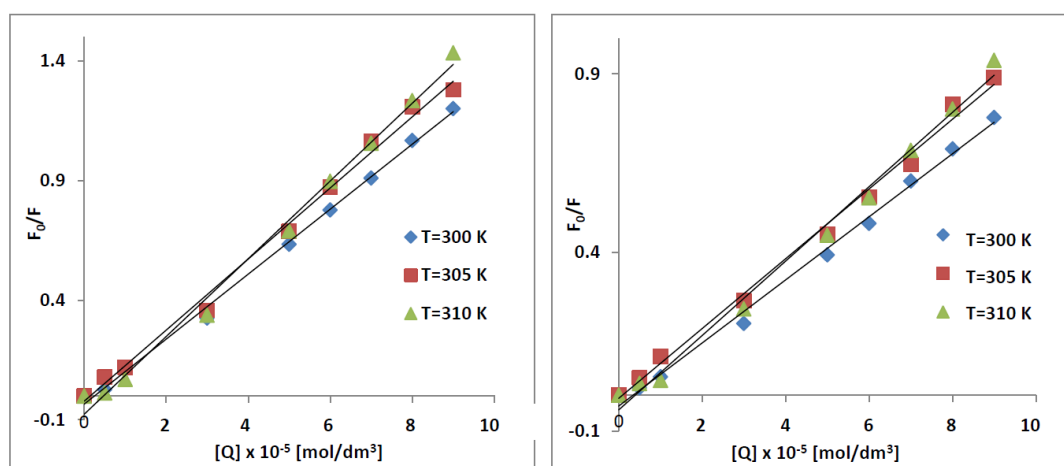

Figure S6. Stern-Volmer plots for quenching of HSA fluorescence by **2b** (left) and **2c** (right) at different concentrations and temperatures (300 K, 305 K, 310 K).  $[\text{HSA}] = 10 \mu\text{M}$ ,  $[\text{complex}] = 5, 10, 30, 50, 60, 70, 80$  and  $90 \mu\text{M}$ ; pH = 7.40, 0.05 M phosphate buffer, incubation at  $37^\circ\text{C}$  during 24 h,  $\lambda_{\text{ex}} = 295 \text{ nm}$ .

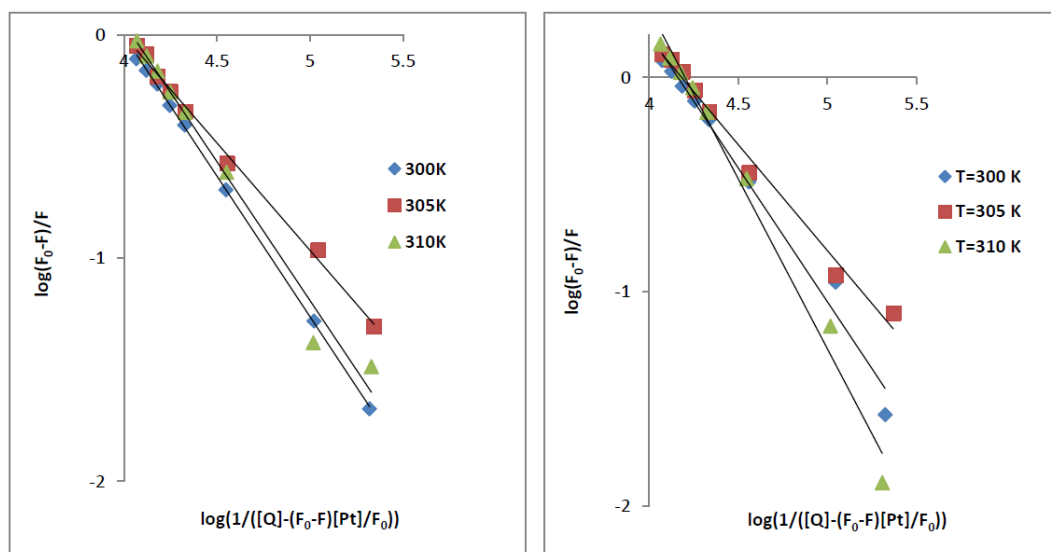

**Figure S7.** Plots of  $\log(F_0-F)/F$  versus  $\log(1/([Q] - (F_0-F)[Pt]/F_0))$  at different temperatures for HSA (10  $\mu\text{M}$ ,  $\text{pH} = 7.40$ ) in the presence of complexes **2b** (left) and **2c** (right).

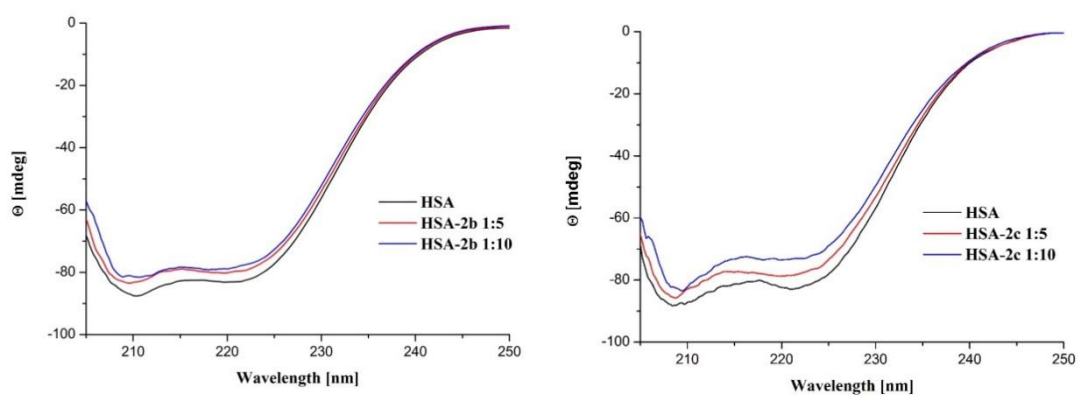

**Figure S8.** Circular dichroism spectra of HSA in the absence and presence of platinum complexes **2b** (left) and **2c** (right).  $[\text{HSA}] = 8 \mu\text{M}$ ,  $\text{pH} = 7.40$ , 0.05M phosphate buffer, incubation at 37  $^\circ\text{C}$  during 24 h.

$$\frac{F_0}{F} = 1 + K_{SV}[Q] = 1 + K_q \tau_0 [Q] \quad \frac{F_0}{F} = 1 + K_{SV}[Q] = 1 + K_q \tau_0 [Q] \quad (S1)$$

$$K_q = \frac{K_{SV}}{\tau_0} \quad (S2)$$

$F_0$  and  $F$ —fluorescence intensity in the absence and presence of a quencher, respectively;

$K_{SV}$ —the Stern-Volmer constant;

$[Q]$ —the concentration of quencher;

$K_q$ —the quenching rate constant of protein;

$\tau_0$ —the lifetime of protein without the quencher (for HSA ~5 ns).

$$\log \frac{F_0 - F}{F} = n \log K_A - n \log \left( \frac{1}{[Q_t] - (F_0 - F)[P_t]/F_0} \right) \quad (S3)$$

$F_0$  and  $F$ —fluorescence intensities in the absence and in the presence of the platinum complex, respectively;

$[Q_t]$  and  $[P_t]$  are the total concentrations of the platinum complexes and HSA, respectively.

$$\ln K_q = - \frac{\Delta H^0}{RT} + \frac{\Delta S^0}{R} \quad (S4)$$

$K_q$ —the bimolecular binding constant at the corresponding temperature ( $T$ );

$R$ —the gas constant;

$\Delta H^0$  and  $\Delta S^0$  are enthalpy and entropy change, respectively.

$$\Delta G^0 = \Delta H^0 - T\Delta S^0 \quad (S5)$$

$\Delta H^0$ —enthalpy change;

$\Delta S^0$ —entropy change;

$\Delta G^0$ —free energy change.
